# Supplementary material for: Nut Consumption and Lung Cancer Risk: Results from Two Large Observational Studies
Source: Oxford University Press journal article supplement (doi:10.1158/1055-9965.epi-16-0806), 2017-01-11
Supplement: 10559965epi160806-sup-173001_1_supp_3808461_pj9kg2.doc [file 10559965epi160806-sup-173001_1_supp_3808461_pj9kg2.doc]

| **Supplemental Table 4. Odds ratios and Hazard ratios (95% Confidence Intervals) for lung cancer and nut consumption in EAGLE and AARP, by smoking intensitya** | | | | | | | | |
| --- | --- | --- | --- | --- | --- | --- | --- | --- |
|  | **Tertile of total nut consumption (frequency per day) in EAGLE** | | | | **Tertile of total nut consumption (frequency per day) in AARP** | | | |
| **Nut consumption**b | **1** | **2** | **3** | ***p-*trend** | **1** | **2** | **3** | ***p-*trend** |
| **Ever smokers** | | | | | | | | |
| **Smoked 1-20 cigarettes per day** | | | | | | | | |
| Cases/controls | 477/420 | 202/227 | 328/433 |  | 1026/16784 | 4097/92646 | 2336/58962 |  |
| Crude | 1.00 | 0.78 | 0.67 | *<0.001* | 1.00 | 0.70 | 0.63 | *<0.001* |
| (95% CI) | (reference) | (0.62-0.99) | (0.55-0.81) |  | (reference) | (0.65-0.75) | (0.58-0.68) |  |
| Multivariablec | 1.00 | 0.76 | 0.73 | *0.008* | 1.00 | 0.88 | 0.85 | *<0.001* |
| (95% CI) | (reference) | (0.58-1.01) | (0.58-0.92) |  | (reference) | (0.82-0.95) | (0.79-0.92) |  |
| **Smoked 21 or more cigarettes per day** | | | | | | | | |
| Cases/controls | 273/112 | 83/37 | 176/81 |  | 1199/12822 | 5012/64487 | 2980/40705 |  |
| Crude | 1.00 | 0.92 | 0.89 | *0.511* | 1.00 | 0.80 | 0.75 | *<0.001* |
| (95% CI) | (reference) | (0.59-1.44) | (0.63-1.26) |  | (reference) | (0.75-0.85) | (0.70-0.80) |  |
| Multivariablec | 1.00 | 0.80 | 1.01 | *0.969* | 1.00 | 0.94 | 0.90 | *0.004* |
| (95% CI) | (reference) | (0.47-1.35) | (0.67-1.51) |  | (reference) | (0.88-1.00) | (0.84-0.97) |  |
| Current smokers | | | | | | | | |
| **Smoked 1-20 cigarettes per day** | | | | | | | | |
| Cases/controls | 253/153 | 113/93 | 151/150 |  | 587/4343 | 2131/19481 | 1151/10652 |  |
| Crude | 1.00 | 0.73 | 0.61 | *0.001* | 1.00 | 0.78 | 0.77 | *<0.001* |
| (95% CI) | (reference) | (0.52-1.03) | (0.45-0.82) |  | (reference) | (0.71-0.86) | (0.69-0.85) |  |
| Multivariablec | 1.00 | 0.80 | 0.61 | *0.006* | 1.00 | 0.88 | 0.84 | *0.001* |
| (95% CI) | (reference) | (0.54-1.20) | (0.43-0.86) |  | (reference) | (0.80-0.96) | (0.76-0.93) |  |
| **Smoked 21 or more cigarettes per day** | | | | | | | | |
| Cases/controls | 148/35 | 47/14 | 95/26 |  | 405/2268 | 1757/9823 | 1012/5743 |  |
| Crude | 1.00 | 0.79 | 0.86 | *0.615* | 1.00 | 0.93 | 0.93 | *0.187* |
| (95% CI) | (reference) | (0.39-1.60) | (0.49-1.53) |  | (reference) | (0.84-1.04) | (0.83-1.04) |  |
| Multivariablec | 1.00 | 0.68 | 0.85 | *0.624* | 1.00 | 1.03 | 0.99 | *0.858* |
| (95% CI) | (reference) | (0.30-1.54) | (0.44-1.64) |  | (reference) | (0.92-1.15) | (0.88-1.12) |  |
| **Former smokers** | | | | | | | | |
| **Smoked 1-20 cigarettes per day** | | | | | | | | |
| Cases/controls | 224/267 | 89/134 | 117/282 |  | 439/12441 | 1966/73165 | 1185/48310 |  |
| Crude | 1.00 | 0.79 | 0.75 | *0.028* | 1.00 | 0.73 | 0.67 | *<0.001* |
| (95% CI) | (reference) | (0.57-1.09) | (0.58-0.97) |  | (reference) | (0.66-0.81) | (0.60-0.75) |  |
| Multivariablec | 1.00 | 0.74 | 0.87 | *0.399* | 1.00 | 0.89 | 0.85 | *0.005* |
| (95% CI) | (reference) | (0.50-1.09) | (0.64-1.19) |  | (reference) | (0.80-0.98) | (0.76-0.96) |  |
| **Smoked 21 or more cigarettes per day** | | | | | | | | |
| Cases/controls | 125/77 | 36/23 | 81/55 |  | 794/10554 | 3255/54664 | 1968/34962 |  |
| Crude | 1.00 | 0.96 | 0.91 | *0.668* | 1.00 | 0.76 | 0.72 | *<0.001* |
| (95% CI) | (reference) | (0.53-1.75) | (0.58-1.42) |  | (reference) | (0.70-0.82) | (0.66-0.78) |  |
| Multivariablec | 1.00 | 0.91 | 1.17 | *0.567* | 1.00 | 0.89 | 0.86 | *<0.001* |
| (95% CI) | (reference) | (0.45-1.82) | (0.68-2.00) |  | (reference) | (0.83-0.97) | (0.79-0.93) |  |
| Abbreviations: AARP, American Association of Retired Persons; EAGLE, Environment And Genetics in Lung cancer Etiology; OR, odds ratio; HR, hazards ratio; CI, confidence interval  aUnless otherwise indicated, data are reported as OR (95% CI) for EAGLE and HR (95% CI) for AARP.  bNut consumption in sex-specific tertiles based on distribution of controls for each sex for EAGLE: Tertile 1 (non-consumers), tertile 2 (1-11 times a year), tertile 3 (once a month up to 3 times a month, once a week up to 5 times a week, and once a day up to 2 or more times a day); Nut consumption in sex-specific tertiles based on distribution of controls for AARP: Tertile 1 (non-consumers ), tertile 2 (1-11 times a year up to once per month), tertile 3 (two to three times per month, once a week up to 6 times per week, and once a day up to 2 or more times a day).  cAdjusted for age, sex, area of residence, education, body mass index, cigarette smoking status, cumulative pack-years of cigarette smoking (continuous, 0 for never-smokers), years since last cigarette smoked (continuous, 0 for never-smokers), and intakes of red and processed meat, fruits, vegetables, and alcohol for EAGLE; Adjusted for age, sex, education, body mass index, energy intake, cigarette smoking status, cigarette smoking dose (categorical, 0 for never-smokers), years since last cigarette smoked (categorical, 0 for never-smokers), and intakes of red and processed meat, fruits, vegetables, and alcohol for AARP. | | | | | | | | |
