# Supplementary material for: Nut Consumption and Lung Cancer Risk: Results from Two Large Observational Studies
Source: Oxford University Press journal article supplement (doi:10.1158/1055-9965.epi-16-0806), 2017-01-11
Supplement: 10559965epi160806-sup-173001_1_supp_3808462_8j9kg3.doc [file 10559965epi160806-sup-173001_1_supp_3808462_8j9kg3.doc]

| **Supplemental Table 5. Hazard ratios (95% Confidence Intervals) for the lag analyses by 5 years and 10 years for lung cancer and nut consumption in AARP, by smoking statusa** | | | | | | | | | | | | |
| --- | --- | --- | --- | --- | --- | --- | --- | --- | --- | --- | --- | --- |
|  | **Quintile of total nut consumption (frequency per day)** | | | | | | | | | | | |
|  | **Lag analysis by 5 years** | | | | | | **Lag analysis by 10 years** | | | | | |
| **Nut consumption**b | **1** | **2** | **3** | **4** | **5** | ***p-*trend** | **1** | **2** | **3** | **4** | **5** | ***p-*trend** |
| **All participants** | | | | | | | | | | | | |
| Cases/controls | 1544/41418 | 3144/102365 | 3504/124453 | 1997/73359 | 1945/73285 |  | 715/33578 | 1527/85525 | 1707/104630 | 910/61710 | 943/61344 |  |
| Crude | 1.00 | 0.80 | 0.73 | 0.71 | 0.69 | *<0.001* | 1.00 | 0.83 | 0.75 | 0.68 | 0.71 | *<0.001* |
| (95% CI) | (reference) | (0.75-0.85) | (0.69-0.78) | (0.66-0.76) | (0.65-0.74) |  | (reference) | (0.75-0.90) | (0.69-0.82) | (0.62-0.75) | (0.64-0.78) |  |
| Multivariablec | 1.00 | 0.95 | 0.92 | 0.90 | 0.90 | *0.003* | 1.00 | 0.96 | 0.94 | 0.85 | 0.91 | *0.066* |
| (95% CI) | (reference) | (0.89-1.01) | (0.87-0.98) | (0.84-0.96) | (0.84-0.97) |  | (reference) | (0.88-1.06) | (0.85-1.02) | (0.77-0.94) | (0.82-1.01) |  |
| **Current smokers** | | | | | | | | | | | | |
| Cases/controls | 639/5442 | 1221/11755 | 1332/13034 | 738/7287 | 675/6665 |  | 306/4097 | 557/9386 | 636/10505 | 337/5828 | 306/5331 |  |
| Crude | 1.00 | 0.85 | 0.83 | 0.83 | 0.83 | *<0.001* | 1.00 | 0.78 | 0.79 | 0.76 | 0.76 | *<0.001* |
| (95% CI) | (reference) | (0.77-0.93) | (0.75-0.91) | (0.74-0.92) | (0.74-0.92) |  | (reference) | (0.68-0.90) | (0.69-0.91) | (0.65-0.88) | (0.65-0.89) |  |
| Multivariablec | 1.00 | 0.94 | 0.92 | 0.90 | 0.89 | *0.034* | 1.00 | 0.87 | 0.87 | 0.83 | 0.81 | *0.012* |
| (95% CI) | (reference) | (0.85-1.04) | (0.84-1.01) | (0.81-1.01) | (0.79-0.99) |  | (reference) | (0.76-1.01) | (0.76-1.00) | (0.71-0.97) | (0.69-0.96) |  |
| **Former smokers** | | | | | | | | | | | | |
| Cases/controls | 732/19321 | 1632/49927 | 1778/60600 | 1021/36022 | 1055/35811 |  | **328/15491** | 814/41227 | 882/50422 | 463/30031 | 523/29598 |  |
| Crude | 1.00 | 0.84 | 0.75 | 0.72 | 0.76 | *<0.001* | 1.00 | 0.92 | 0.81 | 0.72 | 0.82 | *0.005* |
| (95% CI) | (reference) | (0.77-0.92) | (0.69-0.82) | (0.66-0.80) | (0.69-0.83) |  | (reference) | (0.81-1.04) | (0.71-0.92) | (0.62-0.83) | (0.71-0.94) |  |
| Multivariablec | 1.00 | 0.97 | 0.92 | 0.89 | 0.93 | *0.136* | 1.00 | 1.05 | 0.99 | 0.86 | 0.99 | *0.911* |
| (95% CI) | (reference) | (0.89-1.06) | (0.84-1.01) | (0.81-0.98) | (0.84-1.02) |  | (reference) | (0.92-1.19) | (0.87-1.13) | (0.75-1.00) | (0.86-1.15) |  |
| **Never smokers** | | | | | | | | | | | | |
| Cases/controls | 101/14335 | 183/37039 | 258/46315 | 158/27395 | 150/28314 |  | 48/12149 | 102/31884 | 121/39935 | 74/23641 | 78/24373 |  |
| Crude | 1.00 | 0.69 | 0.78 | 0.80 | 0.74 | *0.019* | 1.00 | 0.80 | 0.76 | 0.78 | 0.80 | *0.220* |
| (95% CI) | (reference) | (0.54-0.88) | (0.62-0.98) | (0.63-1.03) | (0.57-0.95) |  | (reference) | (0.57-1.12) | (0.54-1.06) | (0.54-1.12) | (0.56-1.14) |  |
| Multivariablec | 1.00 | 0.73 | 0.83 | 0.82 | 0.73 | *0.021* | 1.00 | 0.84 | 0.83 | 0.82 | 0.83 | *0.330* |
| (95% CI) | (reference) | (0.57-0.93) | (0.66-1.05) | (0.63-1.06) | (0.57-0.96) |  | (reference) | (0.59-1.19) | (0.59-1.16) | (0.56-1.20) | (0.57-1.21) |  |
| Abbreviations: AARP, American Association of Retired Persons; HR, hazards ratio; CI, confidence interval.  aUnless otherwise indicated, data are reported as HR (95% CI).  bNut consumption in sex-specific quintiles based on distribution of controls: Quintile 1 (non-consumers), quintile 2 (1-6 times a year), quintile 3 (7-11 times a year), quintile 4 (once a month up to 2-3 times a month), and quintile 5 (once a week up to 6 times a week, and once a day up to 2 or more times a day).  cAdjusted for age, sex, education, body mass index, energy intake, cigarette smoking status, cigarette smoking dose (categorical, 0 for never-smokers), years since last cigarette smoked (categorical, 0 for never-smokers), and intakes of red and processed meat, fruits, vegetables, and alcohol. | | | | | | | | | | | | |
