# Supplementary material for: Nut Consumption and Lung Cancer Risk: Results from Two Large Observational Studies
Source: Oxford University Press journal article supplement (doi:10.1158/1055-9965.epi-16-0806), 2017-01-11
Supplement: 10559965epi160806-sup-173001_1_supp_3808463_zj9kg3.doc [file 10559965epi160806-sup-173001_1_supp_3808463_zj9kg3.doc]

| **Supplemental Table 6. Hazard ratios (95% Confidence Intervals) for the lag analyses by 5 years and 10 years for lung cancer and nut consumption in AARP, by histologic subtypesa** | | | | | | | | | | | | |
| --- | --- | --- | --- | --- | --- | --- | --- | --- | --- | --- | --- | --- |
|  | **Quintile of total nut consumption (frequency per day)** | | | | | | | | | | | |
|  | **Lag analysis by 5 years** | | | | | | **Lag analysis by 10 years** | | | | | |
| **Nut consumption**b | **1** | **2** | **3** | **4** | **5** | ***p-*trend** | **1** | **2** | **3** | **4** | **5** | ***p-*trend** |
| **Adenocarcinoma** | | | | | | | | | | | | |
| Cases/controls | 466/41604 | 1132/102614 | 1224/124776 | 730/73536 | 695/73463 |  | 219/33666 | 579/85656 | 646/104781 | 353/61773 | 361/61415 |  |
| Crude | 1.00 | 0.95 | 0.84 | 0.85 | 0.82 | *<0.001* | 1.00 | 1.02 | 0.93 | 0.86 | 0.89 | *0.156* |
| (95% CI) | (reference) | (0.86-1.06) | (0.76-0.94) | (0.76-0.96) | (0.73-0.92) |  | reference | (0.87-1.19) | (0.80-1.08) | (0.73-1.02) | (0.75-1.05) |  |
| Multivariablec | 1.00 | 1.08 | 1.00 | 1.03 | 1.01 | 0.886 | 1.00 | 1.15 | 1.10 | 1.03 | 1.08 | 0.375 |
| (95% CI) | (reference) | (0.97-1.21) | (0.90-1.12) | (0.91-1.16) | (0.89-1.14) |  | reference | (0.98-1.36) | (0.94-1.28) | (0.86-1.22) | (0.91-1.29) |  |
| **Squamous cell carcinoma** | | | | | | | | | | | | |
| Cases/controls | 278/41604 | 473/102614 | 641/124776 | 317/73536 | 346/73463 |  | 128/33666 | 237/85656 | 324/104781 | 161/61773 | 173/61415 |  |
| Crude | 1.00 | 0.67 | 0.74 | 0.62 | 0.68 | *<0.001* | 1.00 | 0.71 | 0.80 | 0.67 | 0.73 | *0.006* |
| (95% CI) | (reference) | (0.58-0.78) | (0.64-0.85) | (0.53-0.73) | (0.58-0.80) |  | (reference) | (0.58-0.89) | (0.65-0.98) | (0.53-0.85) | (0.58-0.91) |  |
| Multivariablec | 1.00 | 0.84 | 0.98 | 0.83 | 0.94 | 0.479 | 1.00 | 0.88 | 1.03 | 0.88 | 1.00 | 0.973 |
| (95% CI) | (reference) | (0.72-0.97) | (0.85-1.13) | (0.70-0.98) | (0.80-1.11) |  | (reference) | (0.70-1.09) | (0.84-1.27) | (0.70-1.12) | (0.79-1.26) |  |
| **Small cell carcinoma** | | | | | | | | | | | | |
| Cases/controls | 193/41604 | 368/102614 | 384/124776 | 229/73536 | 181/73463 |  | 92/33666 | 162/85656 | 168/104781 | 87/61773 | 84/61415 |  |
| Crude | 1.00 | 0.75 | 0.64 | 0.65 | 0.52 | *<0.001* | 1.00 | 0.68 | 0.58 | 0.51 | 0.49 | *<0.001* |
| (95% CI) | (reference) | (0.63-0.89) | (0.54-0.76) | (0.54-0.79) | (0.42-0.63) |  | (reference) | (0.53-0.88) | (0.45-0.74) | (0.38-0.68) | (0.37-0.66) |  |
| Multivariablec | 1.00 | 0.93 | 0.86 | 0.89 | 0.73 | 0.004 | 1.00 | 0.81 | 0.72 | 0.64 | 0.65 | 0.006 |
| (95% CI) | (reference) | (0.78-1.12) | (0.72-1.02) | (0.73-1.08) | (0.59-0.90) |  | (reference) | (0.62-1.05) | (0.55-0.93) | (0.47-0.86) | (0.48-0.88) |  |
| Abbreviations: AARP, American Association of Retired Persons; HR, hazards ratio; CI, confidence interval.  aUnless otherwise indicated, data are reported as HR (95% CI).  bNut consumption in sex-specific quintiles based on distribution of controls: Quintile 1 (non-consumers), quintile 2 (1-6 times a year), quintile 3 (7-11 times a year), quintile 4 (once a month up to 2-3 times a month), and quintile 5 (once a week up to 6 times a week, and once a day up to 2 or more times a day).  cAdjusted for age, sex,education, body mass index, energy intake, cigarette smoking status, cigarette smoking dose (categorical, 0 for never-smokers), years since last cigarette smoked (categorical, 0 for never-smokers), and intakes of red and processed meat, fruits, vegetables, and alcohol. | | | | | | | | | | | | |
